# Supplementary material for: Mevalonate kinase deficiency leads to decreased prenylation of Rab GTPases
Source: PubMed Central journal article supplement — Immunol Cell Biol. 2016 Jul 5;94(10):994–9. doi: 10.1038/icb.2016.58 (PMC5122740; doi:10.1038/icb.2016.58), 2016-07-05
Supplement: icb201658x1.pdf [file icb201658x1.pdf]

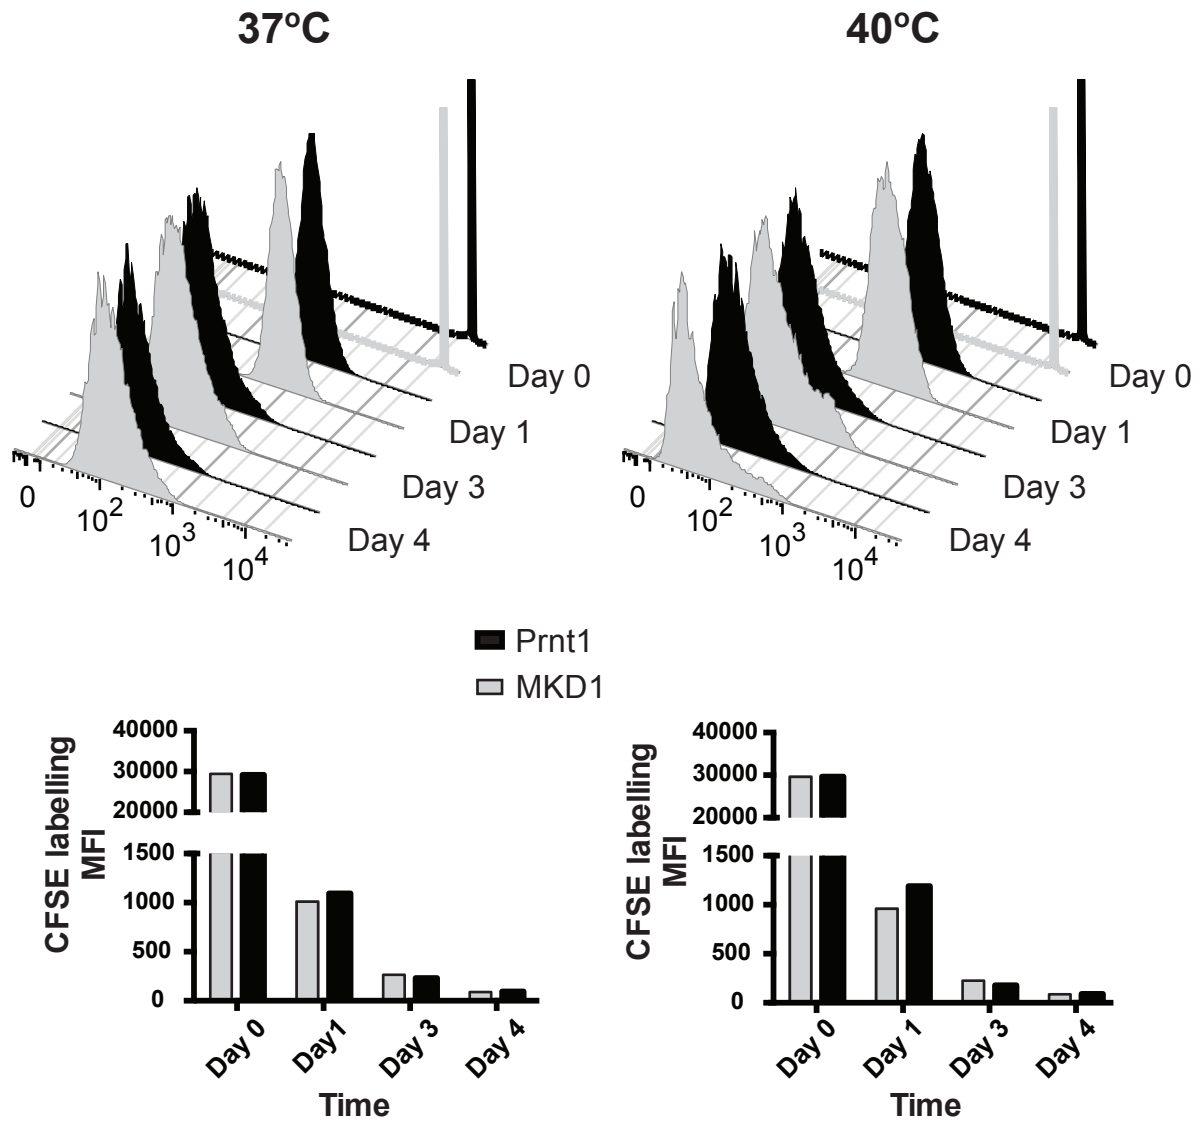

### Supplementary Figure 1.

Proliferation of MKD1 (patient) and Prnt1 (parent control) cell lines is not affected by culture at 40°C, assessed by CFSE dilution. Cells were stained with 5 $\mu$ M CFSE and cultured at 37°C (left) or 40°C (right). After the times indicated, cells were harvested and analysed by flow cytometry. The results are expressed as CFSE Mean Fluorescence Intensity (MFI) and represent one of two independent experiments.
