# Supplementary material for: Mevalonate kinase deficiency leads to decreased prenylation of Rab GTPases
Source: PubMed Central journal article supplement — Immunol Cell Biol. 2016 Jul 5;94(10):994–9. doi: 10.1038/icb.2016.58 (PMC5122740; doi:10.1038/icb.2016.58), 2016-07-05
Supplement: icb201658x2.pdf [file icb201658x2.pdf]

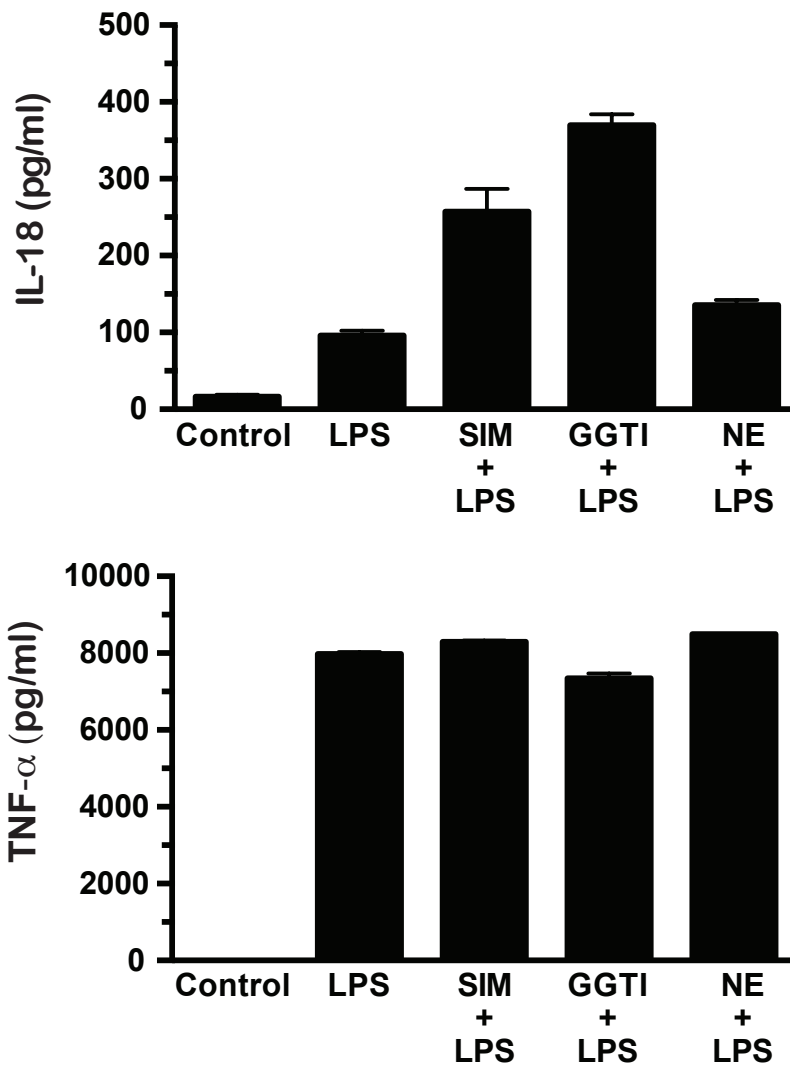

**Supplementary Figure 2.**

Pretreatment of THP-1 cells with simvastatin (SIM) or GGTI-298 enhances the release of IL-18 but not TNF $\alpha$ . THP-1 cells were treated for 24 hours with 5 $\mu$ M simvastatin (SIM), 10 $\mu$ M GGTI-298 (GGTI), 2mM NE10790 (NE) or vehicle control, then stimulated with 200ng/ml LPS for 6 hours before collecting the supernatants for cytokine quantification by ELISA. Values are the mean  $\pm$  SEM of triplicate wells and are representative of three independent experiments.
